# Supplementary material for: A Machine Learning Approach to Study Demographic Alterations in Honeybee Colonies Using SDS–PAGE Fingerprinting
Source: MDPI journal article supplement (doi:10.3390/ani11061823), 2021-06-18
Supplement: s1 [file s1]

**Table S1.** Mean accuracy and standard deviation (SD) of the model obtained with the train dataset (assessed through Repeated Cross-Validation) and number of variables.

| NURSES    |          |      | FORAGERS  |          |      |
|-----------|----------|------|-----------|----------|------|
| Variables | Accuracy | SD   | Variables | Accuracy | SD   |
| 1         | 0.59     | 0.18 | 1         | 0.87     | 0.13 |
| 2         | 0.7      | 0.17 | 2         | 0.91     | 0.14 |
| 3         | 0.73     | 0.16 | 3         | 0.91     | 0.13 |
| 4         | 0.74     | 0.16 | 4         | 0.9      | 0.14 |
| 5         | 0.75     | 0.17 | 5         | 0.9      | 0.13 |
| 60        | 0.84     | 0.16 | 60        | 0.92     | 0.11 |
